# Supplementary material for: Approaches to interim analysis of cancer randomised clinical trials with time to event endpoints: A survey from the Italian National Monitoring Centre for Clinical Trials
Source: Springer Nature journal article supplement (doi:10.1186/1745-6215-9-46), 2008-07-25
Supplement: Additional file 6 [file 1745-6215-9-46-s6.pdf]

|                                           | <i>Univariate analysis</i> | <i>Multivariate analysis</i> |
|-------------------------------------------|----------------------------|------------------------------|
|                                           | <b>OR (95% CI)</b>         | <b>OR (95% CI)</b>           |
| <b>Interim analysis</b>                   |                            |                              |
| Profit sponsor                            | 1.38 (0.66-2.91)           | 1.42 (0.44-4.57)             |
| International collaboration               | 3.72 (1.70-8.13)           | 4.75 (1.38-16.4)             |
| Year of submission                        | 1.13 (0.90-1.42)           | 0.91 (0.67-1.24)             |
| Experimental phase III                    | 1.81 (0.54-6.06)           | 0.87 (0.18-4.31)             |
| Study duration (for each 1 year interval) | 1.22 (0.98-1.52)           | 1.50 (1.10-2.07)             |
| Number of patient (for each hundred)      | 1.04 (0.99-1.09)           | 1.00 (0.95-1.04)             |
| <b>DSMC</b>                               |                            |                              |
| Profit sponsor                            | 3.20 (1.55-6.58)           | 4.37 (1.38-13.9)             |
| International collaboration               | 11.5 (4.80-27.7)           | 10.9 (3.06-38.6)             |
| Year of submission                        | 1.30 (1.04-1.62)           | 1.09 (0.78-1.53)             |
| Experimental phase III                    | 2.89 (0.87-9.62)           | 2.86 (0.58-14.0)             |
| Study duration (for each 1 year interval) | 0.91 (0.77-1.08)           | 1.10 (0.84-1.45)             |
| Number of patient (for each hundred)      | 1.10 (1.02-1.19)           | 1.06 (1.00-1.13)             |
